# Supplementary material for: A Novel Prokaryote-Type ECF/ABC Transporter Module in Chloroplast Metal Homeostasis
Source: PubMed Central journal article supplement (PMC6828968; doi:10.3389/fpls.2019.01264), 2019-10-29
Supplement: Image_1.pdf [file Image_1.pdf]

Figure S1

**A**

```

At-ABCI10 : -----VSTRQGISVPIIRDSCFRIPSGQLWMLIGPNGCGKSTLLKILAGVVPNSSG-----TVEVE-----KEKNEVFQ : 64
Os-ABCI6 : -----LASSLPPTAIEGQGVLSVITRRGRVLPVLKDCSLRVPPGQLWMLIGPNGCGKSTLLKVLAGFLNPSSG-----TVYIN-----RECSYVFQ : 82
Pp-ABCI10 : AASVRNESETAPNSVAIDARDLGLTVTGDKGEDVVVLKGCSSMOIPEGQLWMLIGPNGCGKSTLLKALTGLLRPNRG-----KLYIV-----GERSFVFQ : 90
Cr-ABCI10 : -----OVRRGSLHMLIGPNGCGKSTLLKVLGGLLVPDSE-----LIDAD-----QESGFVFQ : 47
Syn-ABCI10 : -----MSTPATIAQDLNFQWSADR-----PGIQNCSLAVEQGFVWMLIGTNGSGKSTLLRLLAGLLTPQSG-----LVKIA-----EEMGEVFQ : 74
Glo-ABCI10a1: -----MDSLIEVRGLGFAPPQGER-----QLIHNVQLTLAPGETVLLVAGPTGSGKSTLINAAGVIPAHTGGRLEGEVAFAGRSLLPLSVRERARHICTVLO : 92
Glo-ABCI10a2: -----AGPVVLESRILAYGGYPPLPDLITVRAGETVLLKGDNGCGKTTLLKILCGLLRPTGG-----SFAILGKDALKQNVARARTLGFVLO : 82
    
```

```

At-ABCI10 : NPDHQVVMPTVEADVAFGLGKYHDMNQEEVKSRVIAKALEAVGMRDYMQRPIQTLSSGQKQRIA IAGALAEACKVLLLLDELTTFLESDQMGVIKAVKDLINAKKGDVT : 172
Os-ABCI6 : NPDHQVVMPTVESDVAFGLGKLNLSLDEVRSRVSOSLDAVGMLSYSQRPIQTLSSGQKQRTA IAGALAEASKVLLLLDELTTFLEIDYDQMGVIKAVRKSIVGAG-GEVS : 188
Pp-ABCI10 : NPDHQVVMPTAEADVAFGLGHLDLSEEEVKARVHSSLEAVGMNEYGQRPVQTLSSGQKQRTA IAGALAESSRVLLLLDELTTFLESDQMGVLEAVRNVVGGSG---VT : 194
Cr-ABCI10 : NPDHQVVMPTVAADVAFGLGRYVLAEEEVTAARSSIRLVNMEDEMYRATHLSSGQQRVA IAGALAEADPKLLLLDELTTFLESDQMGVLEAVRNVVGGSG---VT : 153
Syn-ABCI10 : NPDHQLVMPTVGADIAFGIVKEKLSPEQEVQVRVGEALQAVNIAEMARRPIYALSSGQKQRIA IAGATARHCSVLLLLDELTTFLESDQMGVLEAVRNVVGGSG---VT : 179
Glo-ABCI10a1: NVEVQIFTDTRVREEVAFGLIENLN-VPPGRIAEQVGEILAEFGLOSQRDWPFAF LSSGQKQRLV LACVLAMDQEVLLLLDELTTFLESDQMGVLEAVRNVVGGSG---VT : 196
Glo-ABCI10a2: NPNHQLFADSVAGEVAQPGVAPE-----FAEQILLEQLNLLPQREQHPQSLSSGQKRLA LAAVLARRPFCILLDELTTFLESDQMGVLEAVRNVVGGSG---VT : 177
    
```

```

At-ABCI10 : ALWVTHRLEELKYADGAVYMENGRVVRHGDAATISDFIKAKQSSYIDQIGS- : 223
Os-ABCI6 : ALWVTHRLEELRYADGATYMEDGQTIIQGDVSTISKYIKKKQARYFGHFEL- : 239
Pp-ABCI10 : ALWVTHRLEELDYADGAVYMENGRVVLSCAVEEVKRYILKQQEDMSRNGALR : 246
Cr-ABCI10 : ALWVTHRLEELQFADAAAYMENGRVVFVFTGTPDEAKAVMRKLGAPV----- : 198
Syn-ABCI10 : ALWVTHRLEELDYCDGAFLEEGKIVAQGDPKPLKQRMNKTAV----- : 223
Glo-ABCI10a1: LLIVETHRLDLVAAVAHRSYCCADGTLPLGLPQSAVASAVLVRPA----- : 240
Glo-ABCI10a2: ALILLSHDPAASRLGARVVAL----- : 199
    
```

**B**

|              | At   | Os   | Pp   | Cr   | Syn  | GloA1 | GloA2 |
|--------------|------|------|------|------|------|-------|-------|
| At-ABCI10    | 100% |      |      |      |      |       |       |
| Os-ABCI6     | 63%  | 100% |      |      |      |       |       |
| Pp-ABCI10    | 55%  | 60%  | 100% |      |      |       |       |
| Cr-ABCI10    | 51%  | 46%  | 49%  | 100% |      |       |       |
| Syn-ABCI10   | 45%  | 48%  | 44%  | 42%  | 100% |       |       |
| Glo-ABCI10A1 | 22%  | 25%  | 22%  | 20%  | 27%  | 100%  |       |
| Glo-ABCI10A2 | 21%  | 23%  | 22%  | 24%  | 23%  | 25%   | 100%  |

**FIGURE S1 |** ABCI10 is conserved among plants and cyanobacteria. **(A)** Amino acid sequence alignment of ABCI10 relatives. Different organisms, gene numbers and NCBI Reference Sequences of GenPept entries are given in brackets. Please note that for all plant proteins the predicted mature sequences according to ChloroP (Emanuelsson et al., 1999) are depicted. At-ABCI10 (*Arabidopsis thaliana*, At4g33460, NP\_195072), Os-ABCI6 (*Oryza sativa japonica*, Os01g56400, BAD52721), Pp-ABCI10 (*Physcomitrella patens*, XP\_024370958), Cr-ABCI10 (*Chlamydomonas reinhardtii*, XP\_001703542), Syn-ABCI10 (*Synechocystis PCC 6803*, gene sll1623, WP\_010872403), Glo-ABCI10A1 and A2 (*Gloeobacter violaceus*, NP\_925000). The conserved motifs Walker A, Walker B, Q-loop, D-loop, and H-loop (black boxes) form the nucleotide binding sites and the ABC-transporter signature motif LSGGQ is found in the helical subdomain. ABCI10 relatives contain the ECF specific Q-helix motif (X-P-D/E-X-Q-Φ: X is any, Φ a hydrophobic amino acid) indicated by a purple box (compare **Figure 1A**). **(B)** Amino acid identities in % of proteins depicted in **(A)**.
