# Supplementary material for: A Novel Prokaryote-Type ECF/ABC Transporter Module in Chloroplast Metal Homeostasis
Source: PubMed Central journal article supplement (PMC6828968; doi:10.3389/fpls.2019.01264), 2019-10-29
Supplement: Image_2.pdf [file Image_2.pdf]

Figure S2

**A**

```

At-ABCI11 : -----CIEVRDVCYRPPGTQLNINLVNFSLEKRSFGILFGKSGSGKTT LLOLLAGLNKPTSGSICIQ : 63
Os-ABCI7  : -----VSAVGYSQLEVRVSYRPPGTEQNLLNEISLNKKEKSFGLLEGRSGSGKTT LLOLLAGLSEPTHGITICIQ : 70
Pp-ABCI11 : -----AALASGIESSGDASTSSLDHELLOVRFVYRPPGTAIDLLNDVSLSLSEKSLGLVYGRSGSGKTT LLOVLAGLATPTEGSIIIG : 84
Cr-ABCI11 : SGAGGPASGAGTAFGDPNSVMGMLMAYAVQMQQQQAAAGAGGAAPGAEVRFEGTTFHPPGAEQPLLQDIRMTLPANSLGIVMGRSGSGKTT LLOVLAGLSEQTSQVVRVL : 110
Syn-ABCI11 : -----MICEVDVCHPPAALHPILKDIINLELAPQOLGLIIGPSGSGKTT LLEILSGLAEPSTSGHTRWQ : 63
Glo-ABCI11 : -----MLPPLNVVELDQVVKCFSEPGGKPLRAVDVAVSLAVRAGEFSLIGESGCGKTT VLRLIGGFEQPDGGTATA : 72
    
```

```

At-ABCI11 : GYGDDG-----QPKADPDLLPTEKVGIVEQFPERFEVADNVLDEITFGWPRQKGSLOLKEQL-TSNLCRAFNVWGLDSIPLDKDPO : 143
Os-ABCI7  : KYNDSG-----NEMGPPELLTAQRVGVFEQFPERYFLADTVLEEITFGWPRQNTDFLREKIL-ALKLQNAINSVGLNGISLEEDPO : 150
Pp-ABCI11 : K-----DSTEKLSLSSKVGIVEQFPERYFVADTVLEELTFGWPRMEDMLRQOL-AMRLCAAVFAVGMADIPEDTNER : 156
Cr-ABCI11 : RGGAGGVALPPTNGYAGGNGSGAHAPAAAAAGGEGGLTMEERMQVGVFEQFPERHFLGEDLLQELTFTWPRLPGYWGERNELSA-RMHIVLEAVGLQDIPMHVPEW : 219
Syn-ABCI11 : T-----QELTFPHLOQLCGIVEQFPERHFCCGGLLEELRLGHF-----ELPRSRIAETLQEVGLGHCFWNLSPQ : 127
Glo-ABCI11 : G-----QPMAGVPP-YRRPVNIVEQ-SYALFPHLVYRNVAFGLEMERLG---RGEV-RLRVEEMALVRLEKLAARK-PC : 141
    
```

```

At-ABCI11 : ILSGGYKRRRLA LAIQLVQTPDLLLILDEPLAGLDWKRADVAKILKHKEL--TILVVSHDLRELAALVDQSWRME TGGVIVAERPPL----- : 229
Os-ABCI7  : SLSGGFKRRRLA LAIQLVQTPDLLLILDEPLAGLDWKRADVNNLLKDKKDH--TILAVSHDLRELYFLVDRSWRME MGGVILKEEALSV----- : 236
Pp-ABCI11 : ALSGGYKRRRLA LAVQLVRMPDLLLILDEPLAGLDWKRADVVKLLWGLKKEC--TILIVSHDLKELTFLVDRAWHMEMGGVILKEKPWPPLGLSTD--- : 247
Cr-ABCI11 : ALSGGQORRLA LAIQLVQTPDLLLILDEPLAGLDWTSRQEVVITLRLKKEQC--TILVVSHDLAETAPLVDVAWRMRIGCSCEPVSWPPTDLAVLEQ : 313
Syn-ABCI11 : ALSGGQORRLS LAVQLIROPNILLILDEPLAGLDWSMRQQLANLILKLDHW-GLIIVV-THDPBELTATADQCWRLE RGSITPCNP----- : 210
Glo-ABCI11 : QLSGGQQRVA LARATAKRPVLLILDEPLSALDLQLRRLRLELKAQRQTGITEIEVTHDCEALSLSDRVGVMRAGRLLQVGTAAEIYERPTSR : 237
    
```

**B**

|            | At   | Os   | Pp   | Cr   | Syn  | Glo  |
|------------|------|------|------|------|------|------|
| At-ABCI11  | 100% |      |      |      |      |      |
| Os-ABCI7   | 65%  | 100% |      |      |      |      |
| Pp-ABCI11  | 52%  | 57%  | 100% |      |      |      |
| Cr-ABCI11  | 34%  | 36%  | 37%  | 100% |      |      |
| Syn-ABCI11 | 41%  | 38%  | 38%  | 32%  | 100% |      |
| Glo-ABCI11 | 29%  | 29%  | 26%  | 19%  | 24%  | 100% |

**FIGURE S2** | ABCI11 is conserved among plants and cyanobacteria.

**(A)** Amino acid sequence alignment of ABCI11 relatives. Different organisms, gene numbers and NCBI Reference Sequences of GenPept entries are given in brackets. Please note that for all plant proteins the predicted mature sequences according to ChloroP (Emanuelsson et al., 1999) are depicted. At-ABCI11 (*Arabidopsis thaliana*, At5g14100, NP\_196914), Os-ABCI7 (*Oryza sativa [japonica]*, Os11g29850, ABA93815), Pp-ABCI11 (*Physcomitrella patens*, XP\_024369396), Cr-ABCI11 (*Chlamydomonas reinhardtii*, PNW71978), Syn-ABCI11 (*Synechocystis PCC 6803*, gene slr0354, WP\_010873396), Glo-ABCI11 (*Gloeobacter violaceus*, WP\_011141404). The conserved motifs Walker A, Walker B, Q-loop, D-loop, and H-loop (black boxes) form the nucleotide binding sites. The ABC-transporter specific helical subdomain contains the signature motif LSGGQ. The ECF-specific Q-helix motif X-P-D/E-X-Q-Φ is absent in ABCI11 proteins because the conserved glutamine residue is substituted by tyrosine, phenylalanine, lysine or histidine residues (yellow box, compare **Figure 1A**).

**(B)** Amino acid identities in % of proteins depicted in **(A)**.
