# Supplementary material for: A Novel Prokaryote-Type ECF/ABC Transporter Module in Chloroplast Metal Homeostasis
Source: PubMed Central journal article supplement (PMC6828968; doi:10.3389/fpls.2019.01264), 2019-10-29
Supplement: Image_3.pdf [file Image_3.pdf]

Figure S3

**A**

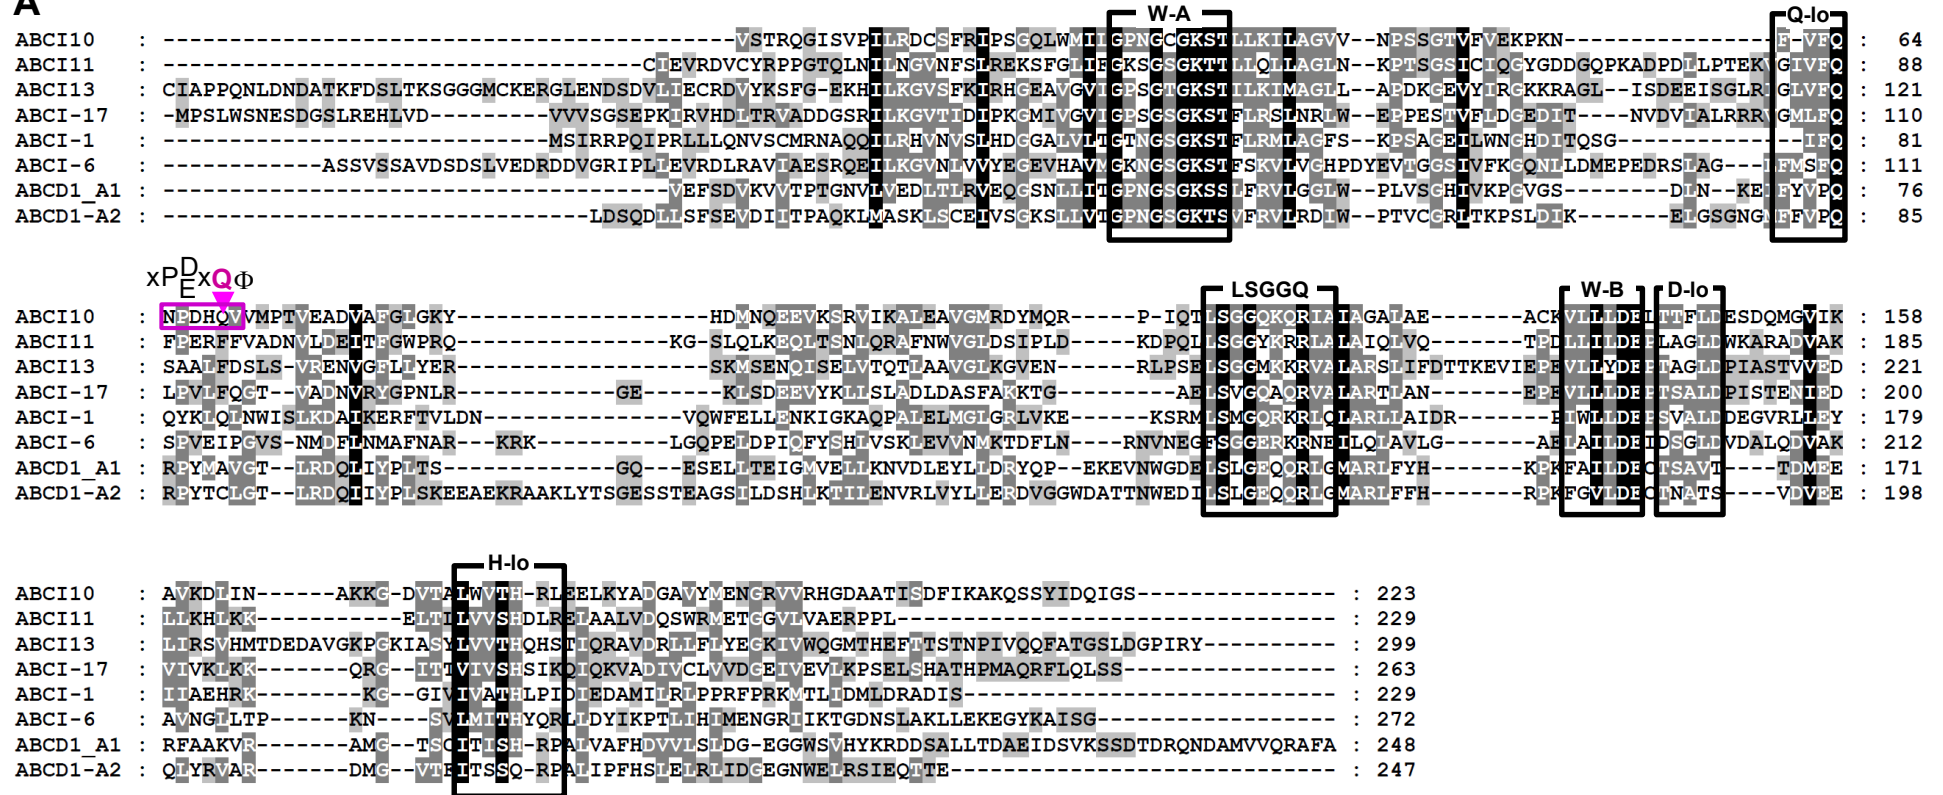

**B**

|         | I10  | I11  | I13  | I17  | I1   | I6   | D1-A1 | D1-A2 |
|---------|------|------|------|------|------|------|-------|-------|
| ABCI10  | 100% |      |      |      |      |      |       |       |
| ABCI11  | 24%  | 100% |      |      |      |      |       |       |
| ABCI13  | 21%  | 21%  | 100% |      |      |      |       |       |
| ABCI17  | 21%  | 19%  | 28%  | 100% |      |      |       |       |
| ABCI1   | 18%  | 19%  | 15%  | 17%  | 100% |      |       |       |
| ABCI6   | 15%  | 21%  | 16%  | 15%  | 15%  | 100% |       |       |
| ABCD-A1 | 15%  | 16%  | 14%  | 19%  | 14%  | 15%  | 100%  |       |
| ABCD-A2 | 13%  | 14%  | 13%  | 16%  | 15%  | 12%  | 37%   | 100%  |

**FIGURE S3 |** ABCI family proteins from *Arabidopsis* with NBD binding domains. **(A)** Amino acid sequence alignment of *Arabidopsis* prokaryotic-type ABCI proteins with NBD binding domains (for gene codes see subfamily I in (Verrier et al., 2008)) The NBD-binding domains of the full-size eukaryotic-type ABC transporter ABCD1 (At1g54350) are for comparison. The conserved motifs Walker A, Walker B, Q-loop, D-loop, and H-loop (black boxes) form the nucleotide binding sites. The ABC-transporter specific helical subdomain contains the signature motif LSSGQ. Please note that the ECF specific Q-helix motif X-P-D/E-X-Q-Φ (purple box) is only present in ABCI10 (compare **Figure 1A**, **Figure S1**, **Figure S2**).
