# Supplementary material for: A Novel Prokaryote-Type ECF/ABC Transporter Module in Chloroplast Metal Homeostasis
Source: PubMed Central journal article supplement (PMC6828968; doi:10.3389/fpls.2019.01264), 2019-10-29
Supplement: Image_4.pdf [file Image_4.pdf]

Figure S4

**A** rec\_At-ABCI10

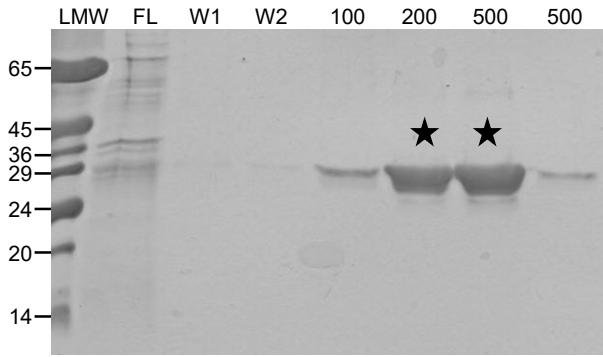

**B** rec\_At-ABCI11

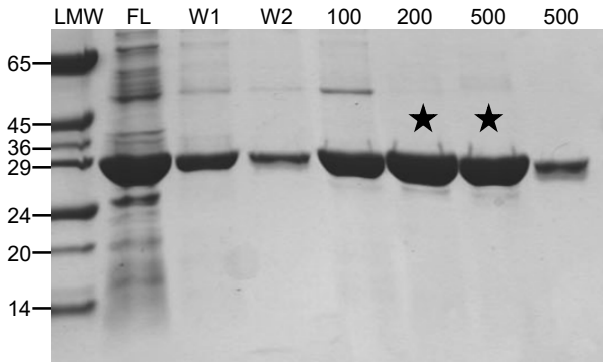

**C**

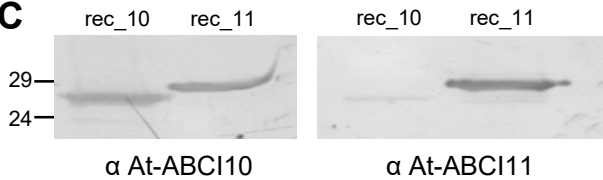

**FIGURE S4** | Production of recombinant At-ABCI10 and At-ABCI11 proteins.

Ni-NTA sepharose purification of rec\_At-ABCI10-[6His] **(A)** and rec\_At-ABCI10[6His] **(B)** over-expressed in *E.coli* cells as described in Materials and Methods. 10 $\mu$ l of each protein fraction in buffer A (50 mM NaPP, pH 8.0, 100 mM NaCl, 2 mM  $\beta$ -mercaptoethanol, 8 M urea) were separated by SDS-PAGE and Coomassie stained. Purification fractions are as follows: FL, flow through of column; W1, W2, wash of column; 100, 200, 500, elution with 100-500 mM imidazole in buffer A. LMW, low molecular weight marker. Asterisks indicate purified proteins used for generation of antisera. Please note that rec\_At-ABCI10 runs at 28kDa, and rec\_At-ABCI11 at 29kDa. **(C)** 25 mg of each recombinant protein At-ABCI10 and At-ABCI11 purified in **(A)**, **(B)** were separated by SDS-PAGE and subjected to immunoblot analysis to check for cross-reaction with the generated antisera  $\alpha$ -At-ABCI10 (left) and  $\alpha$ -At-ABCI11 (right). Please note that  $\alpha$ -At-ABCI10 cross-reacts with the rec\_At-ABCI11 protein. Numbers indicate molecular mass of proteins in kDa.
