# Supplementary material for: A Novel Prokaryote-Type ECF/ABC Transporter Module in Chloroplast Metal Homeostasis
Source: PubMed Central journal article supplement (PMC6828968; doi:10.3389/fpls.2019.01264), 2019-10-29
Supplement: Image_8.pdf [file Image_8.pdf]

Figure S8

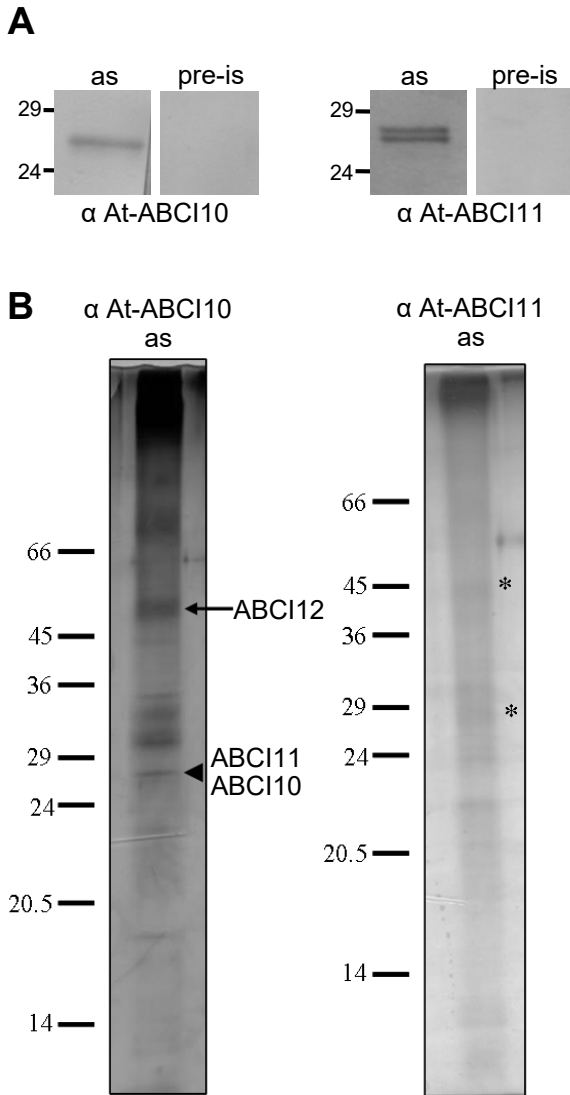

**FIGURE S8** | Co-immunoprecipitation assays. Co-immunoprecipitation (co-ip) assays were performed with the antiserum (as) directed against At-ABC10 ( $\alpha$ -At-ABC10, left panels) or with  $\alpha$ -At-ABC11 (right panels). For control of unspecific interactions, the assay was repeated with the corresponding pre-immune sera (pre-is). **(A)** Immunoblots on elution fractions of co-ip assays with At-ABC10 as / pre-is (left) and At-ABC10 as / pre-is (right). The antisera for At-ABC10 and At-ABC11 both were able to precipitate At-ABC10 (27 kDa) and At-ABC11 (28.5 kDa), respectively, from the solubilized pea chloroplast IE membranes, as indicated by the specific staining in the immunoblots. Please note that  $\alpha$ -At-ABC11 detects a double band between 28-29 kDa as observed before (compare **Figure 3A**). **(B)** Silver stained SDS gels with equal amounts of elution fractions from co-ip assays with At-ABC10 (left) and At-ABC11 (right) antisera. Please note that  $\alpha$ -At-ABC10 precipitated more proteins than  $\alpha$ -At-ABC11. The elution fraction of the latter resembled that of the respective pre-is controls. Protein sequencing of the 50 kDa band (arrow) in the  $\alpha$ -At-ABC10 co-ip revealed peptides of ABCI12, pointing to interaction between ABCI10 and ACBI12 in the chloroplast IE membrane. Further,  $\alpha$ -At-ABC10 precipitated ABCI10 and ACBI11 proteins in a band around 28 kDa (triangle).
