# Supplementary material for: A Novel Prokaryote-Type ECF/ABC Transporter Module in Chloroplast Metal Homeostasis
Source: PubMed Central journal article supplement (PMC6828968; doi:10.3389/fpls.2019.01264), 2019-10-29
Supplement: Image_9.pdf [file Image_9.pdf]

## Figure S9

### A At-ABC110-GFP + AtABC112-mRFP

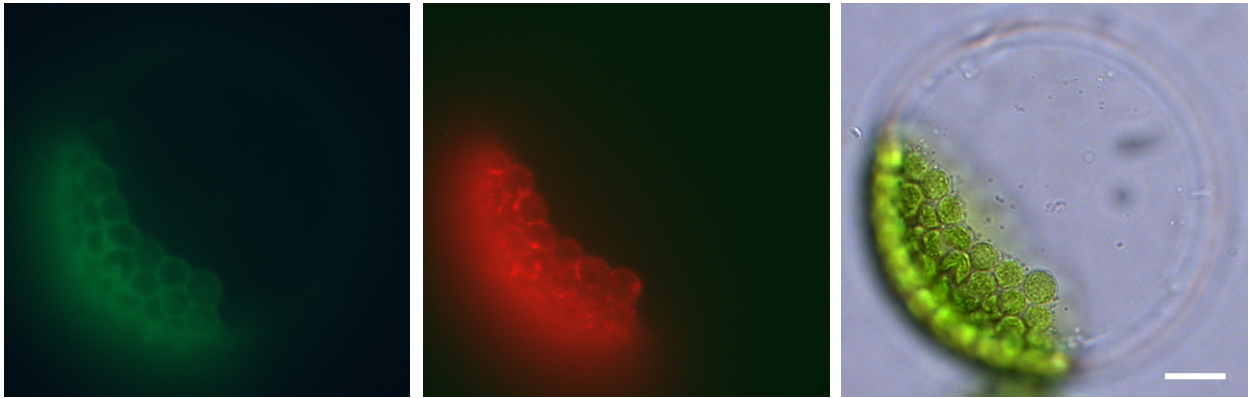

### B At-ABC111-GFP + AtABC112-mRFP

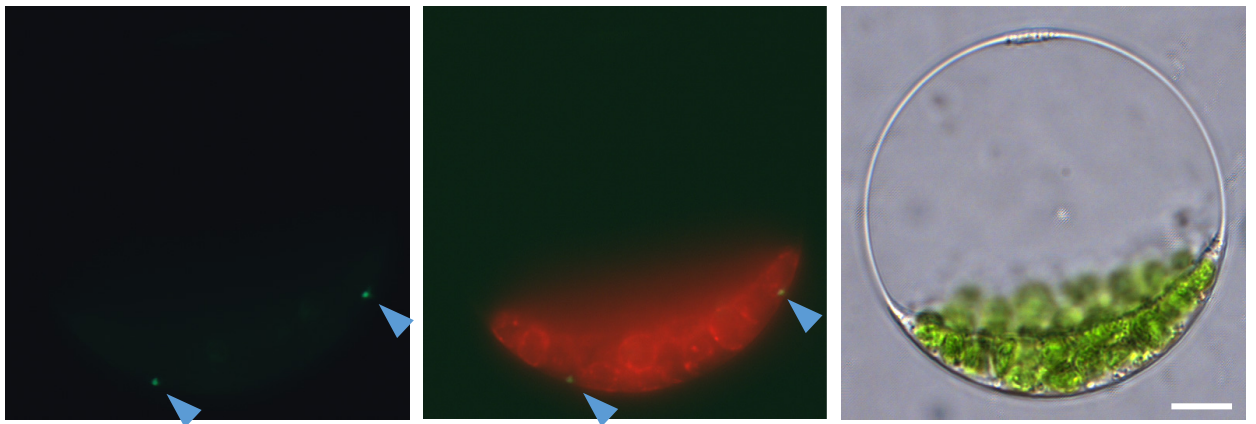

**FIGURE S9** | At-ABC112 in the chloroplast envelope targets At-ABC110 to the IE membrane. *Arabidopsis* leaf protoplasts were transiently co-transformed with constructs for At-ABC110-GFP and At-ABC112-mRFP (**A**) or with At-ABC111-GFP and At-ABC112-mRFP (**B**). Images show GFP- and RFP signals (left and middle panel) as well as a bright field overview (right). As observed in **Figure 8D**, co-expression with ABC12 targets green GFP signals of ABC110 to the envelope membrane. In contrast, ABC111-GFP (**B**), left image), still stains plastoglobuli-like structures (blue triangles) when co-expressed with ABC12 and thus shows the same pattern as when transformed as single construct. Scale bar = 10  $\mu\text{m}$ .
