# Supplementary material for: A Novel Prokaryote-Type ECF/ABC Transporter Module in Chloroplast Metal Homeostasis
Source: PubMed Central journal article supplement (PMC6828968; doi:10.3389/fpls.2019.01264), 2019-10-29
Supplement: Image_11.pdf [file Image_11.pdf]

Figure S11

**A**

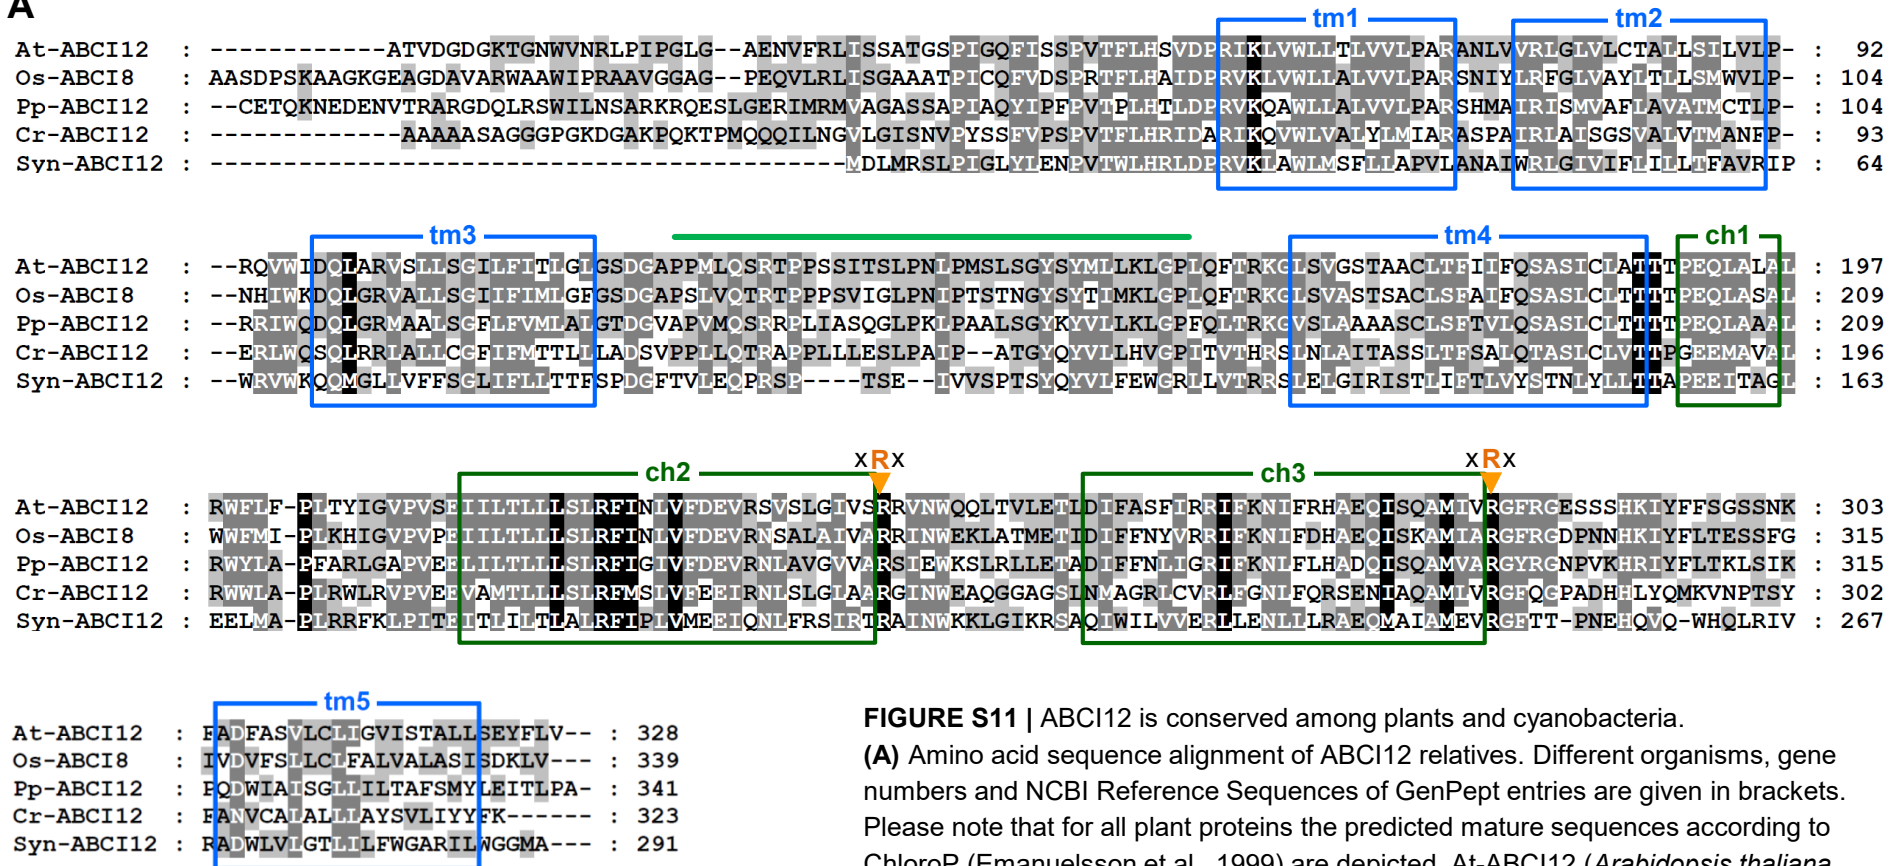

**B**

|            | At   | Os   | Pp   | Cr   | Syn  |
|------------|------|------|------|------|------|
| At-ABCI12  | 100% |      |      |      |      |
| Os-ABCI8   | 59%  | 100% |      |      |      |
| Pp-ABCI12  | 46%  | 48%  | 100% |      |      |
| Cr-ABCI12  | 36%  | 35%  | 36%  | 100% |      |
| Syn-ABCI12 | 28%  | 29%  | 28%  | 30%  | 100% |

**FIGURE S11** | ABCI12 is conserved among plants and cyanobacteria.

**(A)** Amino acid sequence alignment of ABCI12 relatives. Different organisms, gene numbers and NCBI Reference Sequences of GenPept entries are given in brackets. Please note that for all plant proteins the predicted mature sequences according to ChloroP (Emanuelsson et al., 1999) are depicted. At-ABCI12 (*Arabidopsis thaliana*, At3g21580, NP\_566688), Os-ABCI8 (*Oryza sativa [japonica]*, Os05g33230, XP\_015639696), Pp-ABCI12 (*Physocomitrella patens*, XP\_024398704), Cr-ABCI12 (*Chlamydomonas reinhardtii*, PNW75614), Syn-CBY (*Synechocystis PCC6803*, gene slr1978, WP\_010872838). The transmembrane helices tm1-5 (blue boxes) and the coupling helices ch1-3 (green boxes) are depicted according to the structural model of At-ABCI12 (Phyre2; Kelley et al., 2015). The two conserved X-R-X motifs at the end of ch2 and ch3, which most likely are responsible for binding to the ATPase AA dimer (compare **Figures 1, S10**) are indicated by orange arrow heads. The peptide stretch between tm3 and tm4, which is specific for plant and cyanobacterial T proteins (compare **Figure S10**; Eitinger et al., 2011) is highlighted by a green line.

**(B)** Amino acid identities in % of proteins depicted in **(A)**.
